# Supplementary material for: Search filters to identify geriatric medicine in Medline
Source: PubMed Central journal article supplement — J Am Med Inform Assoc. 2011 Sep 23;19(3):468–72. doi: 10.1136/amiajnl-2011-000319 (PMC3341784; doi:10.1136/amiajnl-2011-000319), 2011-09-23
Supplement: amiajnl-2011-000319-s1.pdf [file amiajnl-2011-000319-s1.pdf]

## APPENDIX: THE SEARCH STRATEGIES:

Elderly [tiab] OR community-dwelling [tiab] OR geriatric [tiab] OR “mini-mental state” [tiab] OR alzheimer [tiab] OR alzheimer’s [tiab] OR alzheimers [tiab] OR mmse [tiab] OR caregivers [tiab] OR falls [tiab] OR Adl [tiab] OR Frailty [tiab] OR Gds [tiab] OR Ageing [tiab] OR “hip fractures “ [tiab] OR elders [tiab] OR Frail [tiab] OR Mci [tiab] OR Demented [tiab] OR Psychogeriatrics [tiab] OR “cognitive impairment” [tiab] OR “postmenopausal women” [tiab] OR comorbidities [tiab] OR dementia [tiab] OR aging [tiab] OR older [tiab] OR “daily living” [tiab] OR “cognitive decline” [tiab] OR “cognitive impairment” [tiab] OR residents [tiab] OR “cognitive functioning” OR “old people” [tiab] OR nursing homes [mh] OR Geriatric assessment [mh] OR aging [mh] OR frail elderly [mh] OR Alzheimer disease [mh] OR homes for the aged [mh] OR cognition disorders [mh] OR dementia [mh] OR Activities of daily living [mh] OR aged, 80 and over [mh]

No. 1: The most sensitive search filter (Se=94.8%, Sp= 88.7%)

Elderly [tiab] OR community-dwelling [tiab] OR geriatric [tiab] OR “mini-mental state” [tiab] OR alzheimer [tiab] OR alzheimer’s [tiab] OR alzheimers [tiab] OR mmse [tiab] OR caregivers [tiab] OR falls [tiab] OR Adl [tiab] OR Frailty [tiab] OR Gds [tiab] OR Ageing [tiab] OR elders [tiab] OR Frail [tiab] OR Mci [tiab] OR Demented [tiab] OR Psychogeriatrics [tiab] OR “cognitive impairment” [tiab] OR “postmenopausal women” [tiab] OR Comorbidities [tiab] OR geriatric assessment [mh] OR Nursing homes [mh] OR frail elderly [mh] OR alzheimer disease/epidemiology [mh] OR cognition disorders/diagnosis [mh] OR cognition disorders/epidemiology [mh] OR homes for the aged [mh]

No. 2: The most specific search filter (Se=69.1%, Sp=96.6%)

Elderly [tiab] OR community-dwelling [tiab] OR geriatric [tiab] OR “mini-mental state” [tiab] OR alzheimer [tiab] OR alzheimer’s [tiab] OR alzheimers [tiab]OR mmse [tiab] OR caregivers [tiab] OR falls [tiab] OR Adl [tiab] OR Frailty [tiab] OR Gds [tiab] OR Ageing [tiab] OR elders [tiab] OR Frail [tiab] OR Mci [tiab] OR Demented [tiab] OR Psychogeriatrics [tiab] OR “cognitive impairment” [tiab] OR “postmenopausal women” [tiab] OR Comorbidities [tiab] OR geriatric assessment [mh] OR Nursing homes [mh] OR frail elderly [mh] OR cognition disorders/diagnosis [mh] OR cognition disorders/epidemiology [mh] OR homes for the aged [mh] OR alzheimer disease [mh] OR dementia [tiab]

No. 3: Specific search filter with increased sensitivity (Se=75.3%, Sp=96.0%)
